# Supplementary material
Source: PubMed Central journal article supplement (PMC1955366)
Supplement: hesr0042-0644-s1.pdf [file hesr0042-0644-s1.pdf]

**Appendix A: Example of Wait Time Calculation\***

| Type of Appointment   | <u>July</u>          |              |                      |              | <u>August</u>        |              |                      |              | Overall proportion of appointments |
|-----------------------|----------------------|--------------|----------------------|--------------|----------------------|--------------|----------------------|--------------|------------------------------------|
|                       | <i>Station 1</i>     |              | <i>Station 2</i>     |              | <i>Station 1</i>     |              | <i>Station 2</i>     |              |                                    |
|                       | # of appointments    | Wait in days |                                    |
| Primary Care          | 9                    | 20.8         | 6                    | 36.5         | 9                    | 15.2         | 7                    | 34.2         | 0.42                               |
| Psychology            | 2                    | 35.5         | 6                    | 33.2         | 6                    | 20.9         | 7                    | 37.5         | 0.28                               |
| Optometry             | 9                    | 25.5         | 6                    | 27.4         | 3                    | 23.8         | 4                    | 28.4         | 0.30                               |
| Wait Time Calculation | $(0.42*20.8)+$       |              | $(0.42*36.5)+$       |              | $(0.42*15.2)+$       |              | $(0.42*34.2)+$       |              |                                    |
|                       | $(0.28*35.5)+$       |              | $(0.28*33.2)+$       |              | $(0.28*20.9)+$       |              | $(0.28*37.5)+$       |              |                                    |
|                       | $(0.30*25.5)=$ 26.33 |              | $(0.30*27.5)=$ 32.88 |              | $(0.30*23.8)=$ 19.38 |              | $(0.30*28.4)=$ 33.38 |              |                                    |

\*Suppose there were only three appointment types: 1) primary care visits, 2) psychology and 3) optometry for two parent stations. The total number of appointments in July and August is 74. Overall, 42% of the appointments were in primary care, 28% were in psychology and 30% were in optometry, even though these proportions actually differ by individual station (e.g. the proportions are 45% for primary care and optometry and 10% for psychology for station 1 in July). The wait time for station 1 in July is:  $(0.42*20.8) + (0.28*35.5) + (0.30*25.5)=26.33$  days. Similarly, the wait time for station 2 in August is:  $(0.42*34.2) + (0.28*37.5) + (0.30*28.4) =33.38$ .
