# Supplementary material
Source: PubMed Central journal article supplement (PMC1955366)
Supplement: hesr0042-0644-s2.pdf [file hesr0042-0644-s2.pdf]

**Appendix B: Marginal Effects, Standard Errors and P-values of a Heteroskedastic Probit Model Predicting Six Month Mortality, 2001 (n=37,489)**

| Independent Variables*                                                                    | Marginal Effect | Robust Standard Error <sup>^</sup> | P value |
|-------------------------------------------------------------------------------------------|-----------------|------------------------------------|---------|
| Facility average wait time in days <sup>~</sup>                                           | 0.0003          | 0.0001                             | 0.031   |
| Facility average mortality rate per 1000 <sup>‡</sup>                                     | 0.0009          | 0.0005                             | 0.040   |
| Female (ref=male)                                                                         | -0.0127         | 0.0042                             | 0.002   |
| Age                                                                                       | 0.0017          | 0.0002                             | <0.001  |
| Preventable hospitalization (ref=no) <sup>†</sup>                                         | 0.0218          | 0.0050                             | <0.001  |
| >=50% service connected disability (ref=no)                                               | 0.0113          | 0.0031                             | <0.001  |
| Charlson Index                                                                            | 0.0025          | 0.0005                             | <0.001  |
| Cancer (ref=no)                                                                           | 0.0148          | 0.0041                             | <0.001  |
| Endocrine disease (ref=no)                                                                | 0.0070          | 0.0031                             | 0.025   |
| Heart disease (ref=no)                                                                    | 0.0005          | 0.0030                             | 0.872   |
| Neurological disease (ref=no)                                                             | 0.0237          | 0.0034                             | <0.001  |
| Psychiatric disease (ref=no)                                                              | 0.0081          | 0.0038                             | 0.032   |
| Pulmonary disease (ref=no)                                                                | 0.0210          | 0.0050                             | <0.001  |
| Sensory disease (ref=no)                                                                  | -0.0020         | 0.0034                             | 0.549   |
| Other disease (ref=no)                                                                    | 0.0135          | 0.0047                             | 0.004   |
| Number of disease categories                                                              | -0.0027         | 0.0026                             | 0.287   |
| Natural log of number of observations per clinic                                          | -0.0044         | 0.0012                             | <0.001  |
| Likelihood ratio test of heteroskedacity $\chi^2=13.12$ , degrees of freedom=1; $P<0.001$ |                 |                                    |         |

\*Muscular disease was dropped due to collinearity with the other disease categories.

<sup>^</sup>Standard errors were adjusted for clustering on parent station.

<sup>~</sup>Wait times for each facility between July and September 2001 were averaged together.

<sup>‡</sup> Mortality rates in each facility between October and December 2000 were averaged together

<sup>†</sup>Patients who had a preventable hospitalization or were diagnosed with each of the diseases within a year before his or her first geriatric clinic in FY2001 were categorized as yes.
