# Supplementary material
Source: PubMed Central journal article supplement (PMC1955366)
Supplement: hesr0042-0644-s3.pdf [file hesr0042-0644-s3.pdf]

**Appendix C: Marginal Effects, Standard Errors and P-values of a Heteroskedastic Probit Model Predicting Six Month Mortality, 2001 (n=37,489)**

| Independent Variables*                                            | Marginal Effect                                  | Robust Standard Error <sup>^</sup> | P value |
|-------------------------------------------------------------------|--------------------------------------------------|------------------------------------|---------|
| Facility average wait time in days (ref <26.00 days) <sup>~</sup> |                                                  |                                    |         |
| 26.00-28.59 days                                                  | 0.0041                                           | 0.0040                             | 0.300   |
| 28.60-31.99 days                                                  | 0.0028                                           | 0.0037                             | 0.438   |
| 32.00-40.99 days                                                  | 0.0092                                           | 0.0043                             | 0.033   |
| >=41.00 days                                                      | 0.0077                                           | 0.0043                             | 0.070   |
| Facility average mortality rate per 1000 <sup>‡</sup>             | 0.0009                                           | 0.0004                             | 0.049   |
| Female (ref=male)                                                 | -0.0127                                          | 0.0041                             | 0.002   |
| Age                                                               | 0.0017                                           | 0.0002                             | <0.001  |
| Preventable hospitalization (ref=no) <sup>†</sup>                 | 0.0216                                           | 0.0049                             | <0.001  |
| >=50% service connected disability (ref=no)                       | 0.0112                                           | 0.0031                             | <0.001  |
| Charlson Index                                                    | 0.0025                                           | 0.0005                             | <0.001  |
| Cancer (ref=no)                                                   | 0.0147                                           | 0.0041                             | <0.001  |
| Endocrine disease (ref=no)                                        | 0.0070                                           | 0.0031                             | 0.026   |
| Heart disease (ref=no)                                            | 0.0003                                           | 0.0031                             | 0.926   |
| Neurological disease (ref=no)                                     | 0.0237                                           | 0.0035                             | <0.001  |
| Psychiatric disease (ref=no)                                      | 0.0080                                           | 0.0039                             | 0.036   |
| Pulmonary disease (ref=no)                                        | 0.0208                                           | 0.0050                             | <0.001  |
| Sensory disease (ref=no)                                          | -0.0020                                          | 0.0035                             | 0.572   |
| Other disease (ref=no)                                            | 0.0135                                           | 0.0047                             | 0.004   |
| Number of disease categories                                      | -0.0027                                          | 0.0026                             | 0.303   |
| Natural log of number of observations per clinic                  | -0.0040                                          | 0.0013                             | 0.002   |
| Likelihood ratio test of heteroskedacity                          | $\chi^2=9.84$ , degrees of freedom=1; $P=0.002$  |                                    |         |
| Joint test of significance for wait time dummy variables>=32 days | $\chi^2=7.73$ , degrees of freedom =2; $P=0.021$ |                                    |         |

\*Muscular disease was dropped due to collinearity with the other disease categories.

<sup>^</sup>Standard errors were adjusted for clustering on parent station

<sup>~</sup>Wait times for each facility between July and September 2001 were averaged together.

<sup>‡</sup> Mortality rates in each facility between October and December 2000 were averaged together

<sup>†</sup>Patients who had a preventable hospitalization or were diagnosed with each of the diseases within a year before his or her first geriatric clinic in FY2001 were categorized as yes.
