# Supplementary material
Source: PubMed Central journal article supplement (PMC1955366)
Supplement: hesr0042-0644-s4.pdf [file hesr0042-0644-s4.pdf]

**Appendix D: Distribution of Wait Times Across Months and Parent Stations  
Between January and September 2001 (n=89)**

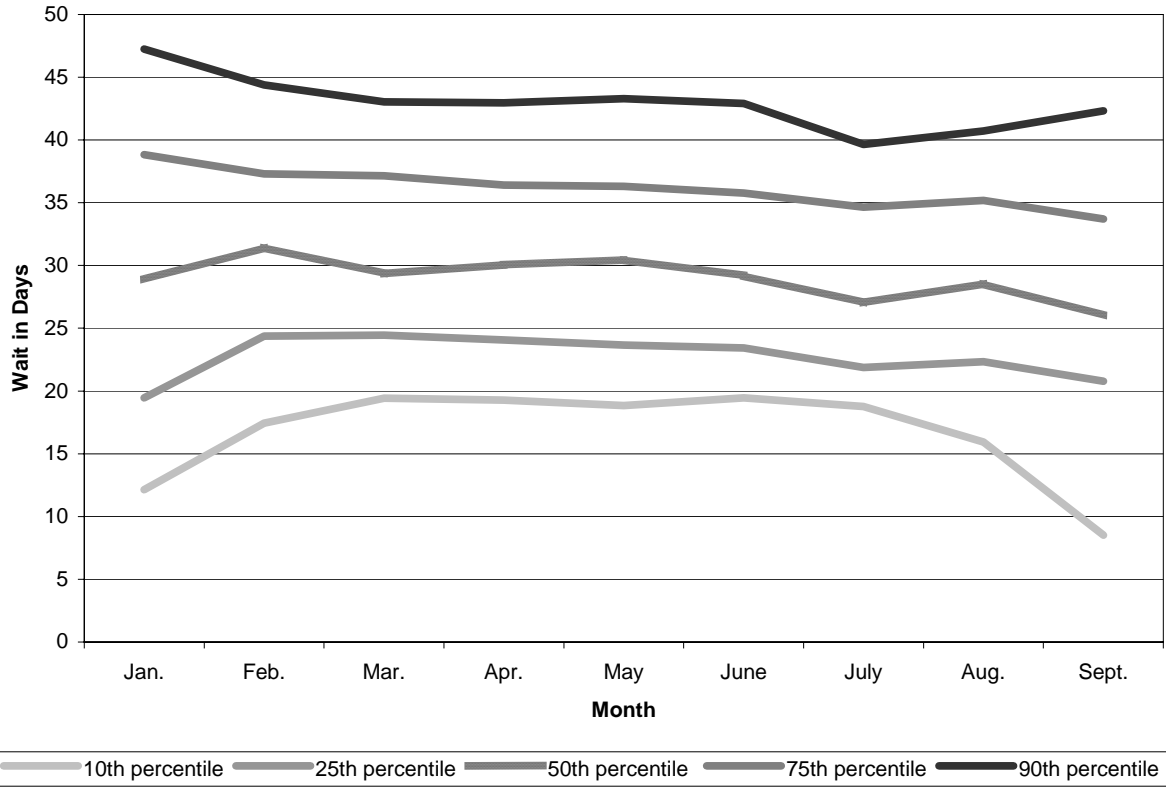

Note: The distribution is based on the wait times of parent stations (n=89) used by individuals in the geriatric sample. Due to missing wait time information in some months, January only included 88 stations, July only included 87 stations and August only included 88 stations.
